# Supplementary material for: Probing the surface of γ-Al2O3 by oxygen-17 dynamic nuclear polarization enhanced solid-state NMR spectroscopy
Source: Royal Society of Chemistry journal article supplement (doi:10.1039/c8cp03132k), 2018-01-01
Supplement: c8cp03132k1.pdf [file c8cp03132k1.pdf]

# **Probing the Surface of $\gamma$ -Al<sub>2</sub>O<sub>3</sub> by Oxygen-17 Dynamic Nuclear Polarization Enhanced Solid-State NMR Spectroscopy**

Wenzheng Li,<sup>a,b†</sup> Qiang Wang,<sup>a,†</sup> Jun Xu,<sup>a,\*</sup> Fabien Aussenac,<sup>c</sup> Guodong Qi,<sup>a</sup>

Xingling Zhao,<sup>a,b</sup> Pan Gao,<sup>a,b</sup> Chao Wang,<sup>a</sup> and Feng Deng<sup>a,\*</sup>

*<sup>a</sup>State Key Laboratory of Magnetic Resonance and Atomic and Molecular Physics,  
National Center for Magnetic Resonance in Wuhan, Wuhan Institute of Physics and  
Mathematics, Chinese Academy of Sciences, Wuhan 430071, P. R. China.*

*<sup>b</sup>University of Chinese Academy of Sciences, Beijing 100049, P. R. China.*

*<sup>c</sup>Bruker Biospin SAS, F-67160 Wissembourg, France*

*<sup>†</sup> These authors contributed equally to this work.*

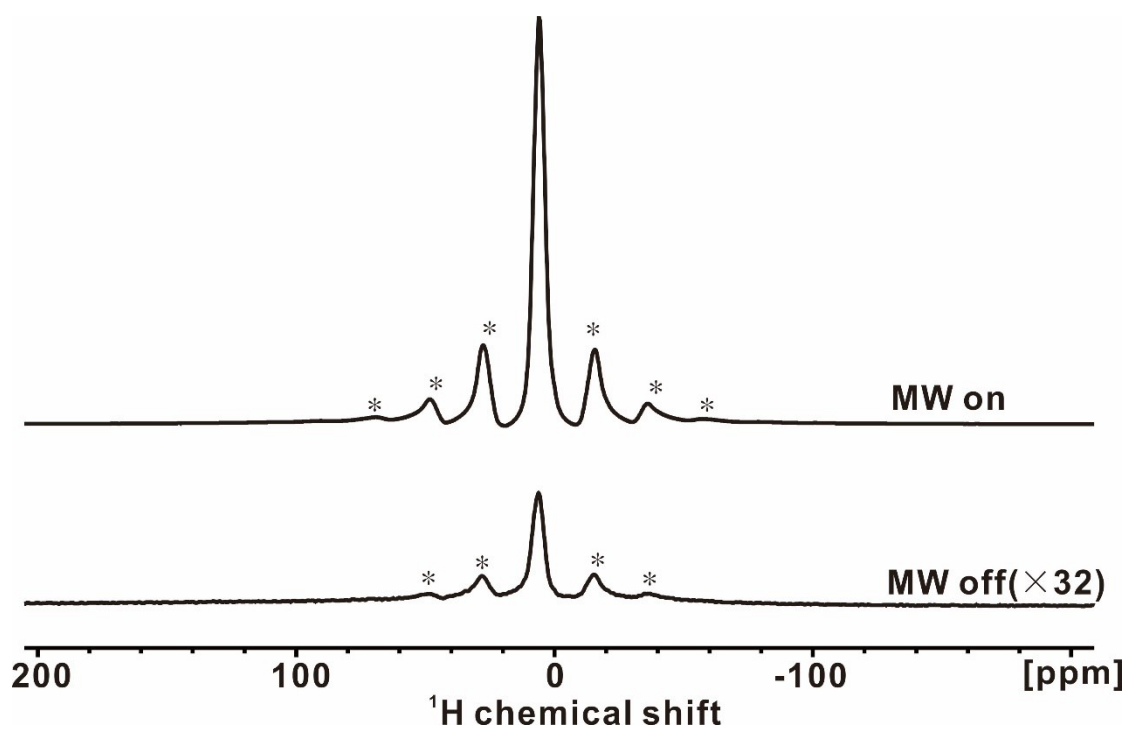

**Figure S1.**  $^1\text{H}$  MAS NMR spectra of dehydrated  $\gamma\text{-Al}_2\text{O}_3$  with microwave irradiation on (MW-on) or off (MW-off). A total of 4 scans were accumulated with a recycle delay of 10 s for each spectrum. The spinning speed was 8 kHz. \* denotes spinning sidebands.

**Table S1.** Isotropic chemical shift  $\delta_{CS}$  and second-order quadrupolar interaction parameter  $P_Q$  (where  $P_Q = C_Q(1 + \eta_Q^2/3)^{1/2}$  and  $C_Q$  and  $\eta_Q$  are the quadrupolar coupling constant and asymmetry, respectively) of each oxygen species on  $\gamma$ -Al<sub>2</sub>O<sub>3</sub>(O) extracted from the 2D <sup>17</sup>O 3QMAS DNP spectrum.  $\delta_{F_2}$  and  $\delta_{F_1}$  represents the center of gravity of each specific species measured along direct dimension F<sub>2</sub> and isotropic dimension F<sub>1</sub>, respectively, on the sheared 2D spectrum in Fig. 3.

| Site   | $\delta_{F_2}$ /ppm | $\delta_{F_1}$ /ppm | $\delta_{CS}$ /ppm | $P_Q$ /MHz |
|--------|---------------------|---------------------|--------------------|------------|
| Site 1 | 48.0                | 71.5                | 56.70              | 2.69       |
| Site 2 | 68.4                | 69.6                | 68.80              | 0.61       |
| Site 3 | 79.3                | 84.0                | 81.04              | 1.20       |

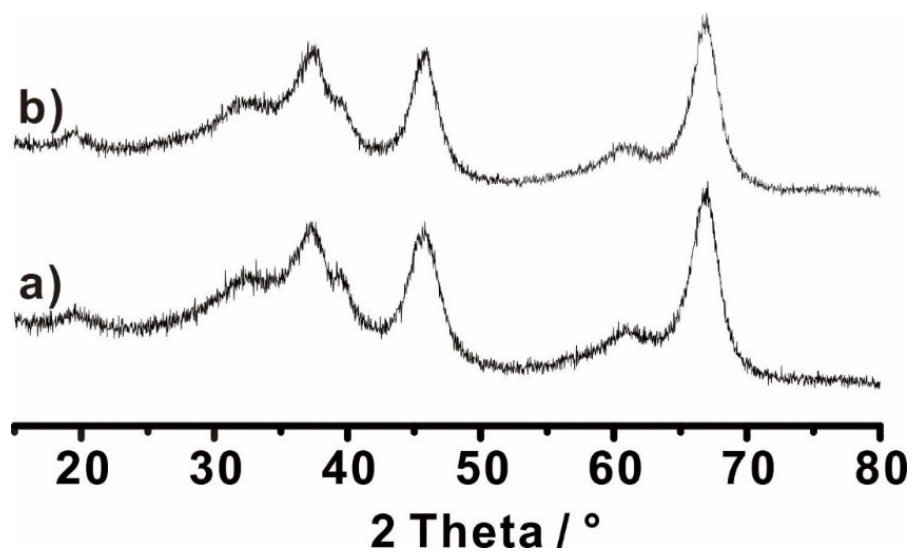

**Figure S2.** XRD patterns of parent  $\gamma\text{-Al}_2\text{O}_3$  (a) and  $\gamma\text{-Al}_2\text{O}_3(\text{O})$  (b).

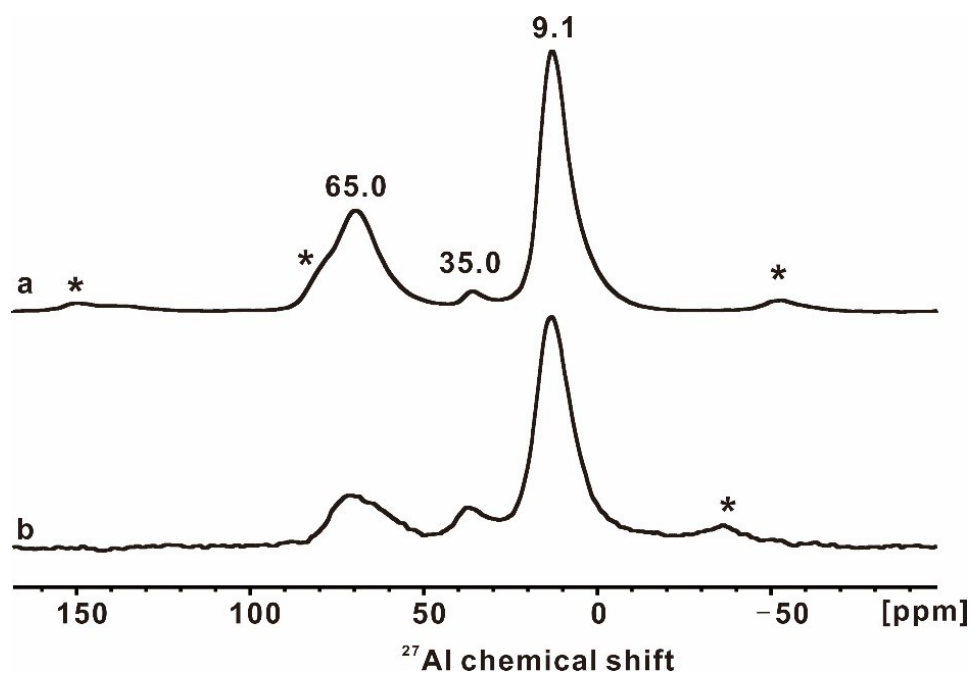

**Figure S3.**  $^{27}\text{Al}$  MAS (a) and  $^1\text{H} \rightarrow ^{27}\text{Al}$  CP/MAS (b) NMR spectra of  $\gamma\text{-Al}_2\text{O}_3(\text{O})$ . \* denotes spinning sidebands. The spectra were recorded at 18.8T.
